# Supplementary material for: On the formation of superoxide radicals on colloidal ATiO3 (A = Sr and Ba) nanocrystal surfaces
Source: Royal Society of Chemistry journal article supplement (doi:10.1039/d0na00106f), 2020-01-01
Supplement: d0na00106f1.pdf [file d0na00106f1.pdf]

## Electronic Supplementary Information (ESI):

### On the formation of superoxide radicals on colloidal $\text{ATiO}_3$ (A = Sr and Ba) nanocrystal surfaces

Muhammad Abdullah,<sup>a</sup> Ruby J. Nelson<sup>a</sup> and Kevin R. Kittilstved<sup>\*a</sup>

<sup>a</sup>Department of Chemistry, University of Massachusetts Amherst, 710 N Pleasant St, Amherst, MA, USA, 01003

\*corresponding author: kittilstved@chem.umass.edu

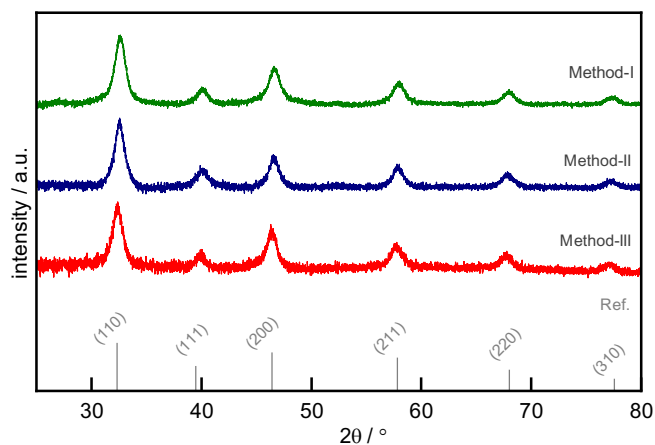

**Fig. S1.** Powder X-ray diffraction patterns of  $\text{SrTiO}_3$  NCs prepared from all three methods indexed to the cubic phase of bulk  $\text{SrTiO}_3$  with  $\text{Pm}\bar{3}\text{m}$  space group.<sup>1</sup>

**Table S1.** The average lattice parameter and crystallite size calculated using Rigaku SmartLab Studio II for all three samples.

| Preparation Method                | Lattice parameter (Å) | Crystallite size (nm) <sup>†</sup> |
|-----------------------------------|-----------------------|------------------------------------|
| I (aerobic without hydrazine)     | 3.9069                | 7.3 ± 0.3                          |
| II (aerobic with hydrazine)       | 3.9162                | 7.5 ± 0.4                          |
| III (anaerobic without hydrazine) | 3.9163                | 7.6 ± 0.7                          |

<sup>†</sup>Crystallite size is the average size calculated from the three most intense reflections: (110), (200) and (211).

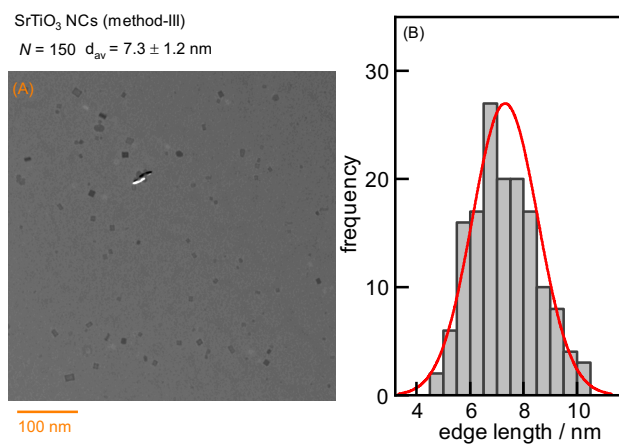

**Fig. S2.** Representative transmission electron microscopy (TEM) image of SrTiO<sub>3</sub> NCs prepared from method III (degassed with argon) showing a clear cubic morphology of NCs. The size distribution plot from analyzing over hundred different particles in raw TEM image using ImageJ software displays an average size of  $7.3 \pm 1.2$  nm in good agreement with crystallite size calculated from diffraction pattern in Figure S1. The cubic morphology of NCs prepared from the method I and method II is already confirmed in our previous report.<sup>2</sup>

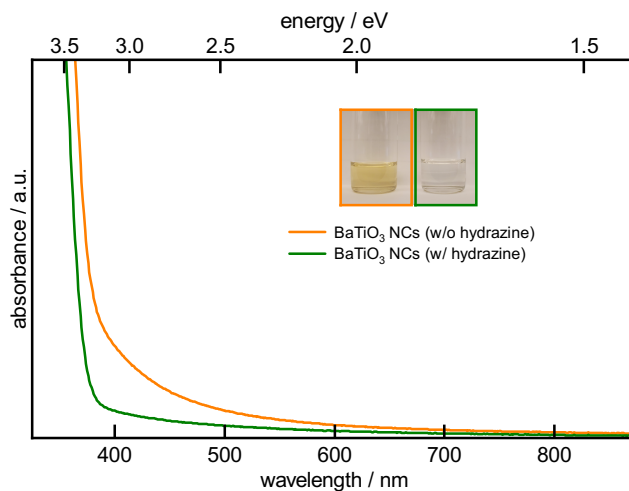

**Fig. S3.** Room temperature electronic absorption spectra of BaTiO<sub>3</sub> NCs prepared from method-A (without hydrazine/orange) and method-B (with hydrazine/green). The color photographs of both samples are shown in inset.

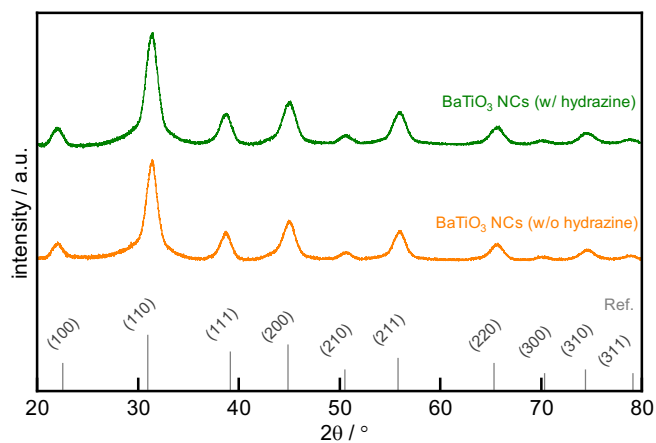

**Fig. S4.** Powder X-ray diffraction pattern of BaTiO<sub>3</sub> NCs prepared from method-A (without hydrazine/orange) and method-B (with hydrazine/green) indexed to cubic phase of BaTiO<sub>3</sub>.<sup>3</sup>

**Table S2.** The average lattice parameter and crystallite size calculated using Rigaku SmartLab Studio II for both samples.

| Sample NCs        | Lattice parameter (Å) | Crystallite size (nm) <sup>†</sup> |
|-------------------|-----------------------|------------------------------------|
| With hydrazine    | 4.0230                | 5.66 ± 0.50                        |
| Without hydrazine | 4.0335                | 6.54 ± 0.53                        |

<sup>†</sup>Crystallite size is the average size calculated from the three most intense reflections: (110), (200) and (211).

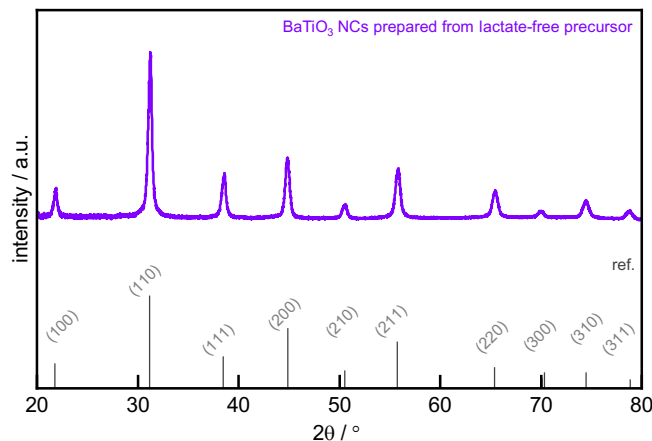

**Fig. S5.** Powder X-ray diffraction pattern of BaTiO<sub>3</sub> NCs prepared from lactate-free method indexed to cubic phase of single crystal BaTiO<sub>3</sub>.

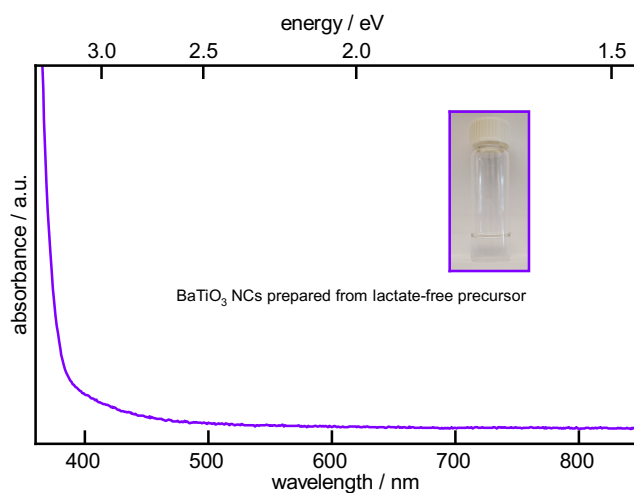

**Fig. S6.** Room temperature electronic absorption spectrum of BaTiO<sub>3</sub> NCs prepared from lactate-free precursor. The color photograph of hexanes solution of as-prepared NCs is shown in inset.

#### References:

1. R. Mitchell, A. Chakhmouradian and P. Woodward, Crystal chemistry of perovskite-type compounds in the tausonite-loparite series,  $(\text{Sr}_{1-2x}\text{Na}_x\text{La}_x)\text{TiO}_3$ , *Phys. Chem. Miner.*, 2000, 27(8), 583.
2. W. L. Harrigan, S. E. Michaud, K. A. Lehuta and K. R. Kittilstved, Tunable electronic structure and surface defects in chromium-doped colloidal SrTiO<sub>3-δ</sub> nanocrystals, *Chem. Mater.*, 2016, 28(2), 430.
3. M. B. Smith, K. Page, T. Siegrist, P. L. Redmond, E. C. Walter, R. Seshadri, L. E. Brus and M. L. Steigerwald, Crystal structure and the paraelectric-to-ferroelectric phase transition of nanoscale BaTiO<sub>3</sub>, *J. Am. Chem. Soc.*, 2008, 130(22), 6955.
